# Supplementary material for: Development and validation of a novel nomogram to predict cancer-specific survival in patients with uterine cervical adenocarcinoma
Source: PubMed Central journal article supplement — Ann Transl Med. 2021 Feb;9(4):293. doi: 10.21037/atm-20-6201 (PMC7944266; doi:10.21037/atm-20-6201), 2021-02
Supplement: atm-09-04-293-supplementary.pdf [file atm-09-04-293-supplementary.pdf]

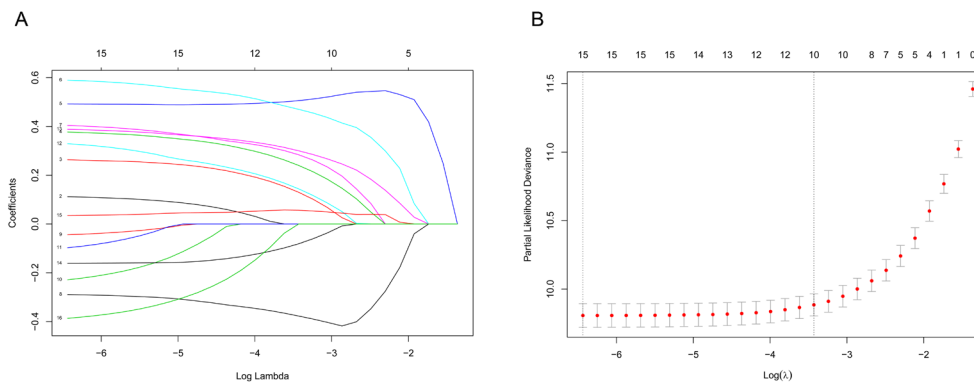

**Figure S1** Selection of predictors using LASSO regression analysis. (A) LASSO coefficient profiles of the 15 variables. (B) A 10-fold cross-validation was used in the LASSO regression. Binomial deviance was plotted versus log ( $\lambda$ ). The left dotted vertical line represents the optimal values with the minimum criteria and the right vertical dotted line represents the one standard error criterion. LASSO, least absolute shrinkage and selection operator.

**Table S1** Demographic and clinical characteristics of the development cohort and the temporal validation cohort from multi-imputed and categorized data

|                               | Overall (N=8,991) | Development cohort (N=5,655) | Validation cohort (N=3,336) | P      |
|-------------------------------|-------------------|------------------------------|-----------------------------|--------|
| Age (%)                       |                   |                              |                             | 0.028  |
| ≤39 years                     | 2,793 (31.1)      | 1,809 (32.0)                 | 984 (29.5)                  |        |
| 40-59 years                   | 4,492 (50.0)      | 2,805 (49.6)                 | 1,687 (50.6)                |        |
| ≥60 years                     | 1,706 (19.0)      | 1,041 (18.4)                 | 665 (19.9)                  |        |
| Race (%)                      |                   |                              |                             | 0.795  |
| White                         | 7,371 (82.0)      | 4,630 (81.9)                 | 2,741 (82.2)                |        |
| Black                         | 603 (6.7)         | 387 (6.8)                    | 215 (6.5)                   |        |
| Other                         | 1,017 (11.3)      | 638 (11.3)                   | 374 (11.4)                  |        |
| Grade (%)                     |                   |                              |                             | 0.052  |
| Grade I                       | 2,858 (31.8)      | 1,746 (30.9)                 | 1,112 (33.3)                |        |
| Grade II                      | 3,685 (41.0)      | 2,354 (41.6)                 | 1,331 (39.9)                |        |
| Grade III and IV              | 2,448 (27.2)      | 1,555 (27.5)                 | 893 (26.8)                  |        |
| Summary stage (%)             |                   |                              |                             | 0.202  |
| Localized                     | 5,690 (63.3)      | 3,593 (63.5)                 | 2,097 (62.9)                |        |
| Regional                      | 2,543 (28.3)      | 1,608 (28.4)                 | 935 (28.0)                  |        |
| Distant                       | 758 (8.4)         | 454 (8.0)                    | 304 (9.1)                   |        |
| AJCC_stage (%)                |                   |                              |                             | 0.019  |
| IA                            | 1,590 (17.7)      | 973 (17.2)                   | 617 (18.5)                  |        |
| IB                            | 4,361 (48.5)      | 2,820 (49.9)                 | 1,541 (46.2)                |        |
| II                            | 959 (10.7)        | 594 (10.5)                   | 365 (10.9)                  |        |
| III                           | 1,308 (14.5)      | 801 (14.2)                   | 507 (15.2)                  |        |
| IV                            | 773 (8.6)         | 467 (8.3)                    | 306 (9.2)                   |        |
| Stage T (%)                   |                   |                              |                             | <0.001 |
| T1a                           | 1,620 (18.0)      | 987 (17.5)                   | 633 (19.0)                  |        |
| T1b                           | 5,030 (55.9)      | 3,234 (57.2)                 | 1,796 (53.8)                |        |
| T2                            | 1,455 (16.2)      | 857 (15.2)                   | 598 (17.9)                  |        |
| T3                            | 606 (6.7)         | 370 (6.5)                    | 236 (7.1)                   |        |
| T4                            | 280 (3.1)         | 207 (3.7)                    | 73 (2.2)                    |        |
| Stage N (%)                   |                   |                              |                             | 0.655  |
| N0                            | 7,332 (81.5)      | 4,620 (81.7)                 | 2,712 (81.3)                |        |
| N1                            | 1,659 (18.5)      | 1,035 (18.3)                 | 624 (18.7)                  |        |
| Stage M (%)                   |                   |                              |                             | 0.180  |
| M0                            | 8,298 (92.3)      | 5,236 (92.6)                 | 3,062 (91.8)                |        |
| M1                            | 693 (7.7)         | 419 (7.4)                    | 274 (8.2)                   |        |
| Surgery of primary site       |                   |                              |                             | 0.001  |
| No                            | 1,886 (21.0)      | 1,123 (19.9)                 | 763 (22.9)                  |        |
| Yes                           | 7,105 (79.0)      | 4,532 (80.1)                 | 2,573 (77.1)                |        |
| Surgery of regional LNs       |                   |                              |                             | <0.001 |
| No                            | 4,105 (45.7)      | 2,793 (49.4)                 | 1,312 (39.3)                |        |
| Yes                           | 4,886 (54.3)      | 2,862 (50.6)                 | 2,024 (60.7)                |        |
| Surgery of distant metastasis |                   |                              |                             | <0.001 |
| No                            | 8,805 (97.9)      | 5,474 (96.8)                 | 3,331 (99.9)                |        |
| Yes                           | 186 (2.1)         | 181 (3.2)                    | 5 (0.1)                     |        |
| Radiation (%)                 |                   |                              |                             | 0.367  |
| No                            | 4,978 (55.4)      | 3,152 (55.7)                 | 1,826 (54.7)                |        |
| Yes                           | 4,013 (44.6)      | 2,503 (44.3)                 | 1,510 (45.3)                |        |
| Chemotherapy (%)              |                   |                              |                             | <0.001 |
| No                            | 5,957 (66.3)      | 3,978 (70.3)                 | 1,979 (59.3)                |        |
| Yes                           | 3,034 (33.7)      | 1,677 (29.7)                 | 1,357 (40.7)                |        |
| Treatment (%)                 |                   |                              |                             | <0.001 |
| Surgery alone                 | 4,533 (50.4)      | 2,894 (51.2)                 | 1,639 (49.1)                |        |
| Surgery and radiotherapy      | 889 (9.9)         | 671 (11.9)                   | 218 (6.5)                   |        |
| Surgery and chemotherapy      | 192 (2.1)         | 107 (1.9)                    | 85 (2.5)                    |        |
| Surgery and CCRT              | 1,617 (18.0)      | 940 (16.6)                   | 677 (20.3)                  |        |
| Radiotherapy                  | 363 (4.0)         | 297 (5.3)                    | 66 (2.0)                    |        |
| Chemotherapy                  | 81 (0.9)          | 35 (0.6)                     | 46 (1.4)                    |        |
| CCRT                          | 1,144 (12.7)      | 595 (10.5)                   | 549 (16.5)                  |        |
| None                          | 172 (1.9)         | 116 (2.1)                    | 56 (1.7)                    |        |
| Tumor size (%)                |                   |                              |                             | 0.163  |
| ≤20 mm                        | 3,934 (43.8)      | 2,496 (44.1)                 | 1,438 (43.1)                |        |
| 21-40 mm                      | 2,460 (27.4)      | 1,565 (27.7)                 | 895 (26.8)                  |        |
| ≥41 mm                        | 2,597 (28.9)      | 1,594 (28.2)                 | 1,003 (30.1)                |        |
| Number of LNs examined (%)    |                   |                              |                             | <0.001 |
| None                          | 3,283 (36.5)      | 1,984 (35.1)                 | 1,299 (38.9)                |        |
| 1-15                          | 2,407 (26.8)      | 1,486 (26.3)                 | 921 (27.6)                  |        |
| 16-30                         | 2,467 (27.4)      | 1,594 (28.2)                 | 873 (26.2)                  |        |
| >30                           | 834 (9.3)         | 591 (10.5)                   | 243 (7.3)                   |        |
| Number of positive LNs (%)    |                   |                              |                             | 0.122  |
| None                          | 7,365 (81.9)      | 4,631 (81.9)                 | 2,734 (82.0)                |        |
| 1-3                           | 1,139 (12.7)      | 699 (12.4)                   | 440 (13.2)                  |        |
| >3                            | 487 (5.4)         | 325 (5.7)                    | 162 (4.9)                   |        |
| Multi-primary tumors (%)      |                   |                              |                             | <0.001 |
| One primary only              | 8,183 (91.0)      | 5,022 (88.8)                 | 3,161 (94.8)                |        |
| 1st of 2 or more primaries    | 808 (9.0)         | 633 (11.2)                   | 175 (5.2)                   |        |
| Event (%)                     |                   |                              |                             | <0.00  |
| Censored                      | 7,200 (80.1)      | 4,277 (75.6)                 | 2,923 (87.6)                |        |
| UAC specific death            | 1,791 (19.9)      | 1,378 (24.4)                 | 413 (12.4)                  |        |

AJCC, American Joint Committee on Cancer; stage T, stage of primary tumor; stage N, stage of lymph nodes; stage M, stage of metastasis; LNs, lymph nodes; CCRT, concurrent chemoradiotherapy; UAC, uterine cervical adenocarcinoma.

**Table S2** The selected variables for the model construction

| Variables               | Coefficient | HR        | 95% CI     | P         |
|-------------------------|-------------|-----------|------------|-----------|
| Grade                   |             |           |            |           |
| Grade I                 | Reference   | Reference |            |           |
| Grade II                | 0.35        | 1.41      | 1.20-1.67  | <0.001*** |
| Grade III and IV        | 0.74        | 2.10      | 1.78-2.48  | <0.001*** |
| Stage T                 |             |           |            |           |
| T1a                     | Reference   | Reference |            |           |
| T1b                     | 1.32        | 3.74      | 2.45-5.70  | <0.001*** |
| T2                      | 2.06        | 7.87      | 5.07-12.20 | <0.001*** |
| T3                      | 2.55        | 12.81     | 8.14-20.14 | <0.001*** |
| T4                      | 2.65        | 14.10     | 8.77-22.69 | <0.001*** |
| Stage N                 |             |           |            |           |
| N0                      | Reference   | Reference |            |           |
| N1                      | 0.58        | 1.79      | 1.58-2.02  | <0.001*** |
| Stage M                 |             |           |            |           |
| M0                      | Reference   | Reference |            |           |
| M1                      | 0.54        | 1.71      | 1.44-2.03  | <0.001*** |
| Surgery of primary site |             |           |            |           |
| No                      | Reference   | Reference |            |           |
| Yes                     | -0.59       | 0.56      | 0.49-0.63  | <0.001*** |
| Tumor size (mm)         |             |           |            |           |
| ≤20                     | Reference   | Reference |            |           |
| 21-40                   | 0.64        | 1.90      | 1.58-2.29  | <0.001*** |
| >40                     | 0.85        | 2.35      | 1.93-2.84  | <0.001*** |

\*\*\*, two sided P values <0.001. Stage T, stage of primary tumor; stage N, stage of lymph nodes; stage M, stage of metastasis; HR, hazard ratio; CI, confidence interval.

**Table S3** Scores of each prognostic factor in the CSS nomogram

| Characteristics         | Points |
|-------------------------|--------|
| Grade                   |        |
| Grade I                 | 0      |
| Grade II                | 13     |
| Grade III and IV        | 28     |
| Stage T                 |        |
| T1a                     | 0      |
| T1b                     | 50     |
| T2                      | 78     |
| T3                      | 96     |
| T4                      | 100    |
| Stage N                 |        |
| N0                      | 0      |
| N1                      | 22     |
| Stage M                 |        |
| M0                      | 0      |
| M1                      | 20     |
| Surgery of primary site |        |
| No                      | 22     |
| Yes                     | 0      |
| Tumor size (mm)         |        |
| ≤20                     | 0      |
| 21-40                   | 24     |
| >40                     | 32     |

CSS, cancer-specific survival; stage T, stage of primary tumor; stage N, stage of lymph nodes; stage M, stage of metastasis.

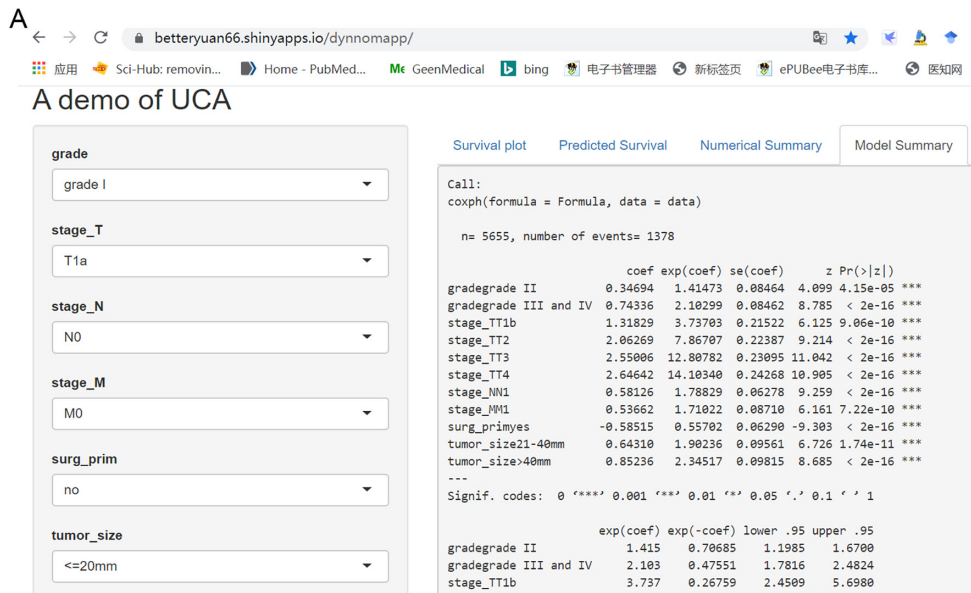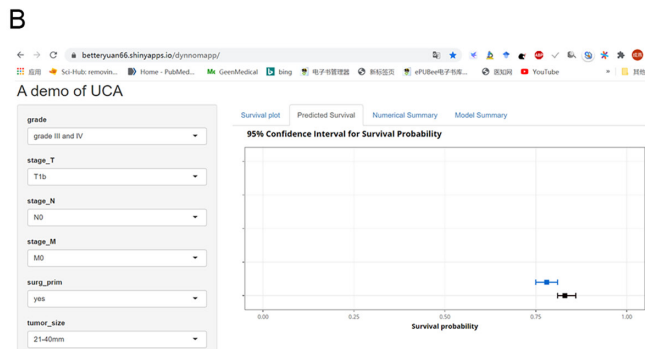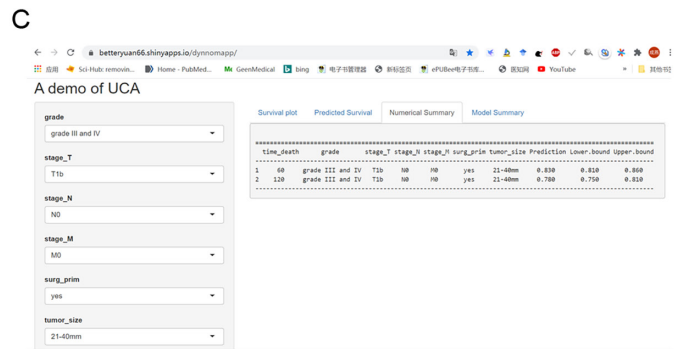

**Figure S2** The web-based nomogram presented as an online calculator based on the model for predicting the probability of CSS in UAC patients, free for access. (<https://betteryuan66.shinyapps.io/dynnomapp/>). The web screenshots show that the 5- and 10-year probability of CSS based on the model was 0.83 (95% CI: 0.81–0.86) and 0.78 (95% CI: 0.75–0.81), respectively, for a UAC patient with tumor grade III, stage T1b, N0, M0, and a tumor size of 30 mm, who received surgery of the primary site. CSS, cancer-specific survival; UAC, uterine cervical adenocarcinoma.
